# Supplementary material for: The dnd operon for DNA phosphorothioation modification system in Escherichia coli is located in diverse genomic islands
Source: PubMed Central journal article supplement (PMC4373003; doi:10.1186/s12864-015-1421-8), 2015-03-17
Supplement: 12864_2015_1421_MOESM1_ESM.pdf [file 12864_2015_1421_MOESM1_ESM.pdf]

a) *dndB*

1 99  
 55989<sup>1</sup> CGTAAAGCGATTGAAGACGCTTTAGAAGCTCGCCCGAGCTGGGGCAGGATAAACATACCIGTGCTGTTITTTGTTCGATGAAGGATTAACCGCAGCCAA  
 PPN8b-EC2<sup>2</sup> .....  
 EC1003-8<sup>3</sup> .....  
 EC1004-8<sup>4</sup> .....  
 SE11<sup>5</sup> ..... A ..... T .....  
 EC062/10<sup>6</sup> ..... T ..... T ..... T ..... G ..... G ..... G .....  
 EC075/10<sup>7</sup> ..... T ..... C ..... T ..... C ..... G ..... T ..... C ..... G ..... T ..... G .....  
 B7A<sup>8</sup> ..... T ..... C ..... T ..... C ..... G ..... T ..... C ..... G ..... T ..... G .....  
 100 198  
 55989 CAGATGTTIGCGGATCTGAATAAATAIGCIATTCGCCAGICCGTCGTGGCATCGITGTAIGATCATCGGGAIGCCAGTTCAAATITGGCGGTTAT  
 PPN8b-EC2 .....  
 EC1003-8 .....  
 EC1004-8 .....  
 SE11 ..... T ..... C ..... A ..... C .....  
 EC062/10 ..... C ..... T ..... A ..... C ..... C ..... T ..... AC ..... C ..... C ..... T ..... C ..... T ..... CC .....  
 EC075/10 ..... C ..... C ..... C ..... A ..... C ..... G ..... C ..... A ..... C ..... C ..... T ..... G ..... C .....  
 B7A ..... C ..... C ..... C ..... A ..... C ..... G ..... C ..... A ..... C ..... C ..... T ..... G ..... C .....  
 207  
 55989 CTGGCAATG  
 PPN8b-EC2 .....  
 EC1003-8 .....  
 EC1004-8 .....  
 SE11 .....  
 EC062/10 .....  
 EC075/10 .....  
 B7A .....

b) *dndC*

1 99  
 55989 CCCCCGAAATGCGCAACAAGATGTTTTGTAGTGTATCCGATACGCTGGTGGAAACACCAGTGGTAGTAGATIT AATTAAGAAAACGATGTTGCAA  
 PPN8b-EC2 .....  
 EC1003-8 .....  
 EC1004-8 .....  
 SE11 ..... G ..... A ..... C ..... A ..... G .....  
 EC062/10 ..... T ..... GT ..... T ..... G ..... A ..... G ..... A ..... G ..... G ..... C ..... C ..... C ..... G .....  
 EC075/10 ..... G ..... A ..... G ..... G ..... G ..... C ..... G ..... A ..... C ..... G ..... C ..... G ..... G .....  
 B7A ..... G ..... A ..... G ..... G ..... G ..... C ..... G ..... A ..... C ..... G ..... C ..... G ..... G .....  
 100 198  
 55989 TIGAGGCAGGCGCAAAGCGTAATGGCCTGCCGATCACTCAACATGCGGTAACGCCIAAAACIAATGAAACCTCTGGGTCAATTTACTGGGAAAGGTT  
 PPN8b-EC2 .....  
 EC1003-8 .....  
 EC1004-8 .....  
 SE11 ..... A .....  
 EC062/10 ..... C ..... A ..... C ..... T ..... A ..... T ..... A ..... T ..... G ..... C ..... T ..... T ..... G ..... T ..... C .....  
 EC075/10 ..... G ..... A ..... G ..... C ..... T ..... C ..... C ..... G .....  
 B7A ..... G ..... A ..... G ..... C ..... T ..... C ..... C ..... G ..... G ..... G ..... G ..... G ..... G .....  
 199 297  
 55989 ATCCGGCCCCAACCCGCGAGTTTCGCTGGTGTACCGAACGCGATGAAAATCAAICCGGTGAGIGACTTTATTAAAGAAAGGTACGCCAGTTIGATGAAG  
 PPN8b-EC2 .....  
 EC1003-8 .....  
 EC1004-8 .....  
 SE11 ..... T ..... G ..... T ..... C ..... A .....  
 EC062/10 ..... T ..... T ..... T ..... G ..... T ..... C ..... T ..... C ..... T ..... A ..... C .....  
 EC075/10 ..... T ..... T ..... T ..... C ..... T ..... C ..... T ..... G ..... C ..... T ..... T .....  
 B7A ..... T ..... T ..... T ..... C ..... T ..... C ..... T ..... G ..... C ..... T .....  
 298 396  
 55989 TAATTGTTGTCTAGGTTACCGTAGIAGIGAGAGTGCCTTCGTCGCGCAGGTATCGCAAACACAAAATTGATGGCTACCGCTTGGCCCGGCATACCA  
 PPN8b-EC2 .....  
 EC1003-8 .....  
 EC1004-8 .....  
 SE11 ..... G ..... C ..... C ..... C .....  
 EC062/10 ..... G ..... G ..... GT ..... G ..... A ..... G ..... C ..... C ..... C ..... A ..... T ..... T ..... G ..... A ..... G ..... T ..... AC ..... T ..... T .....  
 EC075/10 ..... C ..... C ..... C ..... A ..... T ..... G ..... C ..... A ..... T ..... G ..... G ..... G ..... A ..... C ..... T .....  
 B7A ..... C ..... C ..... A ..... T ..... G ..... C ..... A ..... T ..... G ..... G ..... A ..... A ..... C ..... T .....  
 397 495  
 55989 CACTGGCAAATGCGTTIATCTATACCCCIATTGATACCTGGGATGTAGAAGACGTCTGGAAACTGCTGCGCGGCCGCTTCCGCTATGCICCTGAAIATA  
 PPN8b-EC2 .....  
 EC1003-8 .....  
 EC1004-8 .....  
 SE11 ..... G .....  
 EC062/10 ..... C ..... G ..... C ..... T ..... G ..... C ..... G ..... C ..... T ..... GT ..... A ..... A ..... G .....  
 EC075/10 ..... G ..... A ..... C ..... C ..... C ..... T ..... G ..... G ..... G ..... G ..... C ..... G .....  
 B7A ..... G ..... A ..... C ..... C ..... C ..... T ..... G ..... G ..... G ..... G ..... C ..... G .....  
 520  
 55989 TCGACGAATGGGAAAGCCCGTGGGG  
 PPN8b-EC2 .....  
 EC1003-8 .....  
 EC1004-8 .....  
 SE11 .....  
 EC062/10 ..... T ..... T .....  
 EC075/10 ..... G .....  
 B7A ..... G .....

c) *dndD*

1 99  
55989 TGTGTCCGTCAGGTGCAAAAACIGCATGATGCGGCCCGCAGTCAGCATGGCTTITAGTAGCGCCTTCAAAAATGCCGAGAAACAATIAATITACTCGAT  
PPN8b-EC2 .....T.....  
EC1003-8 .....T.....  
EC1004-8 .....T.....  
SE11 .....T.....A.G..GCA...CATCA...T.C.A...T.G.C...A.T.....C...CC.G.....  
EC062/10 .....T.....  
EC075/10 .....T.....A.T.....GC...C.C.T.TTA...CA.T.A...C.T.G.T.G...T.....G.A.....  
B7A .....T.....A.T.....GC...C.C.T.TTA...CA.T.A...C.T.G.T.G...T.....G.A.....  
100 198  
55989 CCGGTATAGCGAGCTAITAACTCAGGCGAGAGTAAAGACGCTATCTGCTAACTTGAAGTTGCCTATCGCAAACCTGGCTCGIAAAGAAGATATGCAACTG  
PPN8b-EC2 .....  
EC1003-8 .....  
EC1004-8 .....  
SE11 TAC..C...T...C.T..G...C...G..A.AAT...G...A...C.A...G..T.A..G..T  
EC062/10 .....  
EC075/10 .....C..C...T...C...TC.G...A...G.GA.A...C.GC...T.C.T.GT...C...G..T.A...T  
B7A .....C..C...T...C...TC.G...A...G.GA.A...C.GC...T.C.T.GT...C...G..T.A...T  
199 297  
55989 AGTGCTCATATIAACCCAGAGACATTTGACGTTAGGITAATIGATGAGAAGGGAICTGTCAATTAATCGTAAGTITACTATCTGCCGGTAAAAGCAGATT  
PPN8b-EC2 .....  
EC1003-8 .....  
EC1004-8 .....  
SE11 .A..G...A.T..GC...T...AC.GG.G...A...T.G..G...C.G.T...G...  
EC062/10 .....T...G...C...A...  
EC075/10 .....G...C...TC.A..G...T...A...T.C.A.A...C...T...T...A...  
B7A .....G...C...TC.A..G...T...A...T.C.A.A...C...T...T...A...  
298 396  
55989 TATGCCATTGCTATTCTTGAGGCGCTAGCAAAAACITCTGGTCGTGATTGGCCGGTATTAATGATACGCCATTAGGACGCTCTGGAITCACAACATCGG  
PPN8b-EC2 .....  
EC1003-8 .....  
EC1004-8 .....  
SE11 .....G...C...G...C...G...C...G...G...T...G...  
EC062/10 .....G...  
EC075/10 .....A...G...C...C...A..A...C...A...G..T...C..T...A...  
B7A .....A...G...C...C...A..A...C...A...G..T...C..T...A...  
397 495  
55989 GATAAACTAATTAACCAITAITTCCCATIIGCCAGGCATCAAGTGGTCTAITGTCTIACCAGTACGGAAGTGGAIGAACGTTATTTIGTIGACCAAITA  
PPN8b-EC2 .....  
EC1003-8 .....  
EC1004-8 .....  
SE11 .....T.G...T...GGAA...G..T...GC.A..C...T...C..G...C..C..T...C.G  
EC062/10 .....T...  
EC075/10 .....T.G...T..C..C...TGAA...T...G..T...T.GC.T...T...A...T..G..G  
B7A .....T.G...T..C..C...TGAA...T...G..T...T.GC.T...T...A...T..G..G  
496 551  
55989 CGIGATGATATITCTCATGCTTACGAGATAGTATTTAACACGCATACTAAATCATC  
PPN8b-EC2 .....  
EC1003-8 .....  
EC1004-8 .....  
SE11 .....T...T..G...TG...  
EC062/10 .....C...  
EC075/10 .....C...T...T..G...TG.A...G...  
B7A .....C...T...T..G...TG.A...G...

d) *dndE*

1 99  
55989 TCGGTGGAGAGTGGATTTCGCTATTCAICAGAACGGGATAATCGGAACTAGATGGTTCGCTGGTGTGGATAAAGATTACGTGGCTGGGGAGACAITA  
PPN8b-EC2 .....  
EC1003-8 .....  
EC1004-8 .....  
SE11 .....GC.T..G...G.AA..G..G...C...A..C...A...T...A...C.G  
EC062/10 .....C.G...G...A...  
EC075/10 .....C.T...A...G.AA..G..G...A...C...A...C...  
B7A .....C.T...A...G.AA..G..G...A...C...A...C...  
100 194  
55989 CAGACTACGGAATGGTAITGAAGATGCTTTATCCGCAGITAGCTCAGAAGGATATGGTTAAAGCATGGGCGCCATGTGGAGGATGGGATTCG  
PPN8b-EC2 .....T...A..C...  
EC1003-8 .....T...A..C...  
EC1004-8 .....T...A..C...  
SE11 ..AG...A...C...G..A...TA.TC.C.AC..A..ATTG..AA...A..A...T...A..C...  
EC062/10 .....C...T...A..C...  
EC075/10 .....AG...A...GC...A..A...AG..A...CGT..A...G...T...T...A..C...  
B7A .....AG...A...GC...A..A...AG..A...CGT..A...G...T...T...A..C...

**Figure S1:** Multiple-sequence alignment of *dnd* genes using Clustal W.
